# Supplementary material
Source: PubMed Central journal article supplement (PMC5648713)
Supplement: JCM.00822-17_zjm999095633s1.pdf [file JCM.00822-17_zjm999095633s1.pdf]

Supplementary Table 1. Genetic differences between published *cps* loci of serotypes 35C and 42 (coding sequence only)

| Nucleotide <sup>a</sup> | 35C <sup>b</sup> | 42 <sup>c</sup> | Gene             | Function                       | Amino Acid <sup>d</sup>  |
|-------------------------|------------------|-----------------|------------------|--------------------------------|--------------------------|
| 3471                    | A                | G               | <i>cpsB/wzh</i>  | Phosphotyrosine phosphatase    | E152E                    |
| 3477                    | T                | C               |                  |                                | I154I                    |
| 3482                    | G                | T               |                  |                                | <b>R156M<sup>e</sup></b> |
| 3536                    | C                | A               |                  |                                | G174G                    |
| 3541                    | G                | C               |                  |                                | <b>R176P</b>             |
| 3543                    | T                | G               |                  |                                | <b>Y177D</b>             |
| 3566                    | T                | G               |                  |                                | A184A                    |
| 3574                    | T                | C               |                  |                                | F187F                    |
| 3577                    | A                | G               |                  |                                | L188L                    |
| 3582                    | A                | G               |                  |                                | <b>Q190R</b>             |
| 3583                    | G                | T               |                  |                                | <b>Q190R</b>             |
| 3597                    | A                | G               |                  |                                | I195I                    |
| 3599                    | C                | G               |                  |                                | I195I                    |
| 6039                    | C                | T               | <i>cpsE/wchA</i> | Initiating glycosyltransferase | G293G                    |
| 8484                    | A                | G               | <i>wzy</i>       | Polymerase                     | K385K                    |
| 9132                    | A                | G               | <i>wcrI</i>      | Glycosyltransferase            | <b>Q152R</b>             |

<sup>a</sup> Nucleotide number is with respect to serotype 35C reference sequence (GenBank Accession No. CR931706)

<sup>b</sup> Accession No. CR931706

<sup>c</sup> Accession No. CR931715

<sup>d</sup> Amino acid sequence differences are with respect to serotype 35C

<sup>e</sup> Boldface indicates a missense substitution

Supplementary Table 2. Primers used for genetic manipulations in this study

| Primer <sup>a</sup> | Sequence (5'-3') <sup>b</sup>                                        | Description                                          |
|---------------------|----------------------------------------------------------------------|------------------------------------------------------|
| 5163                | TTAGCGACAGGTGATCATAAGG                                               | Upstream flanking region of <i>wciG</i> in 5705-06   |
| 3184                | TTCTCCTTTTTATAATTTTTTTAAT<br>CTGTTATTTAAATAG                         | Upstream flanking region of <i>wciG</i> in 5705-06   |
| 5230                | TAAAAAAATTATAAAAAGGAGAA<br>CAAGATGTACGATTATC                         | Downstream flanking region of <i>wciG</i> in 5705-06 |
| 3160                | GTCTTGAGCTTTGACTGCC                                                  | Downstream flanking region of <i>wciG</i> in 5705-06 |
| 5229                | CAAATTATTAGGAAAACTAGAG<br>TGAGGAGGATATATTTG                          | <i>aad9</i> from pCLT1242                            |
| 3184                | TTCTCCTTTTTATAATTTTTTTAAT<br>CTGTTATTTAAATAG                         | <i>aad9</i> from pCLT1242                            |
| 5240                | TAGCTAACTAGTTAGGAGGAAGG<br>AAATAATAAATGAGAAAAAATCG<br>AAATATCAACCTAG | <i>wciG</i> from 5705-06 with SpeI site              |
| 3196                | TTTTTCGCATGCTTATAATTTGAC<br>GATTCGATTGAAGTAAG                        | <i>wciG</i> from 5705-06 with SphI site              |

<sup>a</sup>Primers beginning in 5 or 3 indicate forward or reverse primers with respect to the reference sequence, respectively.

<sup>b</sup>Underlined residues indicate a restriction site.
